# Supplementary material for: Bewohner*innen mit Parkinson-Syndrom in der stationären Altenhilfe
Source: Springer Nature journal article supplement (doi:10.1007/s00391-021-01874-y), 2021-03-23

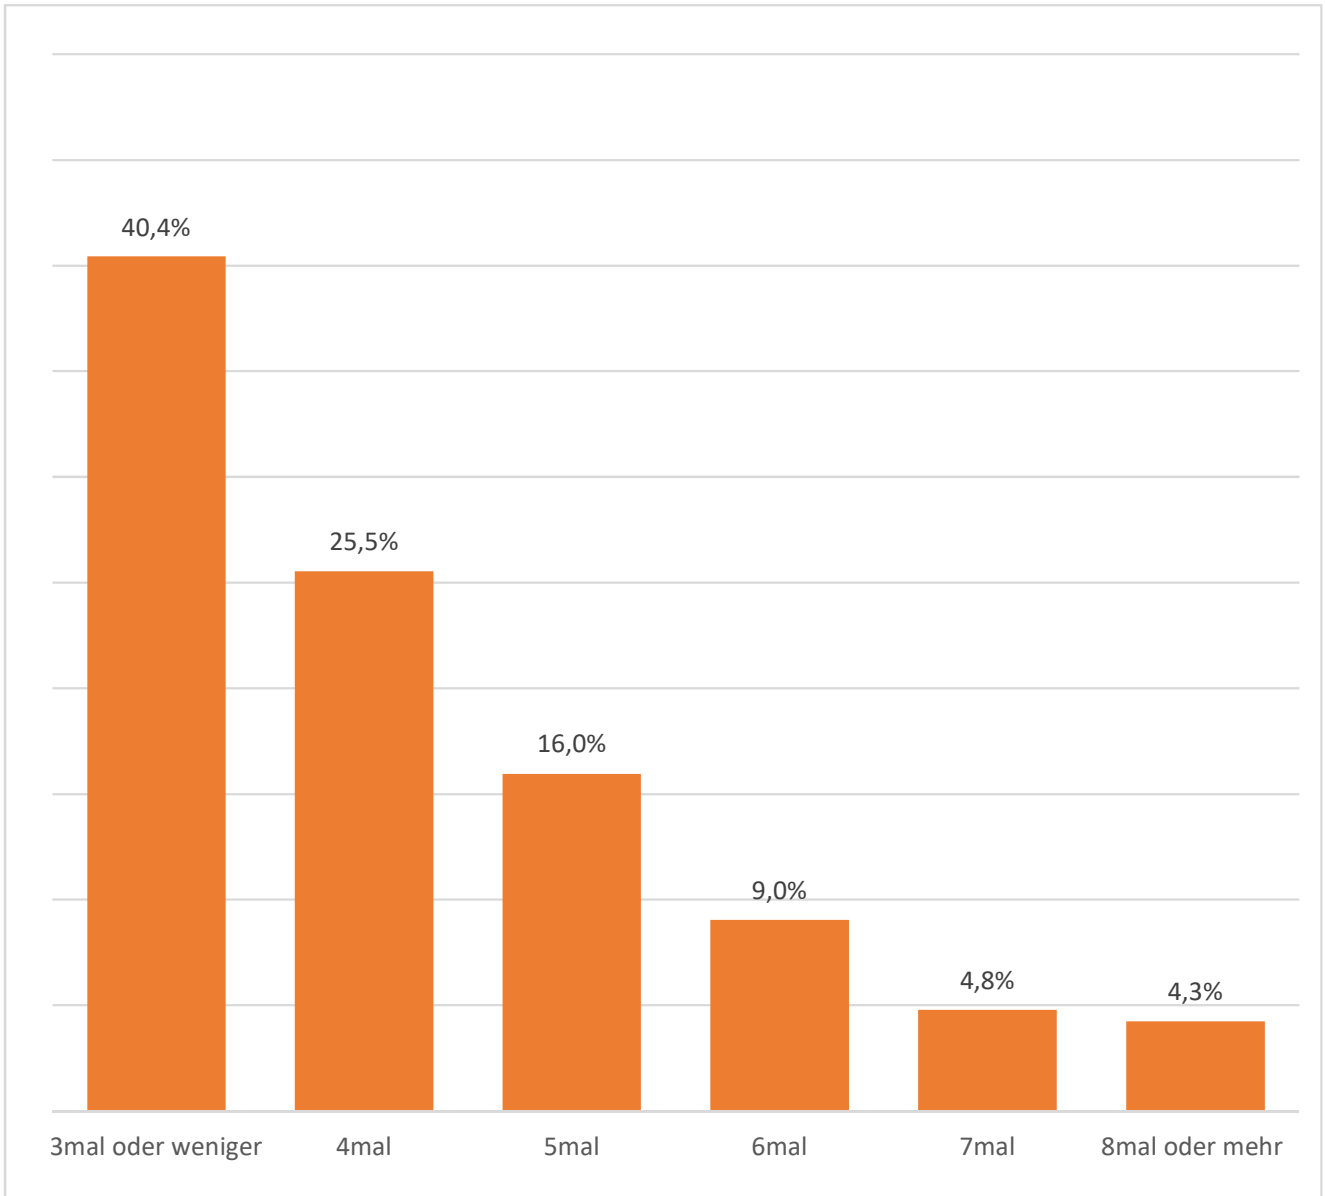

Supplement: MOESM2 [file 391_2021_1874_MOESM2_ESM.pdf]
