# Supplementary material for: Residents with Parkinson’s disease in the institutional care: A cross-sectional survey of nursing homes in Germany
Source: Z Gerontol Geriatr. 2021 Mar 23;55(5):399–405. [Article in German] doi: 10.1007/s00391-021-01874-y (PMC9360124; doi:10.1007/s00391-021-01874-y)
Supplement: Supplementary file 1 [file 391_2021_1874_MOESM1_ESM.xlsx]

## Sheet: Tabelle1
		Anzahl	%
	Bewohner OHNE Krankenhausaufenthalt	128	0.649746
	Bewohner MIT Krankenhausaufenthalt	69	0.350254
	davon einmal	45	0.652174
	davon mehrmals	24	0.347826
	aufgrund von…
	Verletzungen nach einem Sturz	18	0.26087
	einem schlechten Allgemeinzustand	14	0.202899
	Verschlecherung der Parkinsonsymptome	10	0.144928
	einer anderen Erkrankung	7	0.101449
	Halluzinationen, Depression, Demenz	5	0.0724638
	einer Pneumonie	3	0.0434783
	einem lebensbedrohlichen Notfall	2	0.0289855
	Routineuntersuchungen	1	0.0144928
	Nebenwirkungen der Medikation	1	0.0144928
	* 5.8%=andere Gründe, 5.8%=fehlende Angaben)
	Supplement Tabelle 1: Krankenhausaufenthalte in den letzten 12 Monaten und Gründe (n=197)
